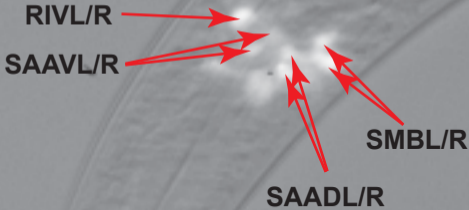

Source: https://storage.googleapis.com/plos-corpus-prod/10.1371/journal.pbio.3002280/2/pbio.3002280.s005.pdf?X-Goog-Algorithm=GOOG4-RSA-SHA256&X-Goog-Credential=wombat-sa%40plos-prod.iam.gserviceaccount.com%2F20250424%2Fauto%2Fstorage%2Fgoog4_request&X-Goog-Date=20250424T050021Z&X-Goog-Expires=86400&X-Goog-SignedHeaders=host&X-Goog-Signature=96c505c42b40f1911733fc90b8ed47e689b96bd6522b3f98c04daa24f5b7f374f36383aa7ee4a4a243f9fff9cb3e693d3e002d1314d6e178d5e9869c7dcc8105b3dacdd2b56e2a31a730a3b0991dcd73d9a785136360b33970aff9f341c8c51b4cb88c76f8949341f8f20c227604285c1616a86a2ade6ff95c08dcb61c81dcabbe692faadceaabf4fd56c82b75928cd36708208e446da8f6084f0b8c0cb4bbb0b5e53946ea0b45f70719fec9cdc8d7574e5a005c574a31147cb40b3372e15593cdabfa38d3a59298c40f9f0a7d709d1bb0d687d6bfc0d41d7d98c98ed41fddbc3e70dde69f02fea6876b40bf9eee720e8d24d701e56b30bbac14b56d26ff8521
