**A**

Chrimson in  
touch neurons  
gtACR2 in  
RIV, SMB, SAA

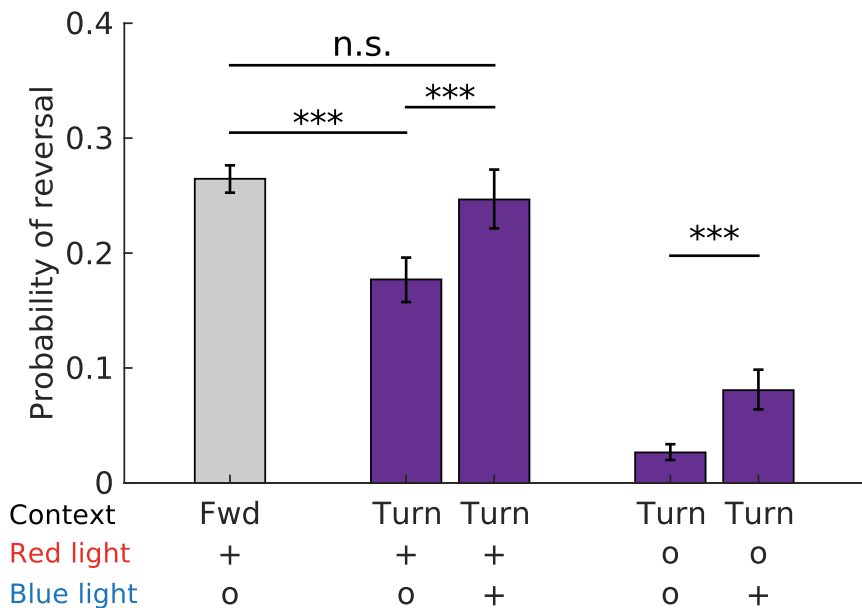**B**

Chrimson in  
touch neurons

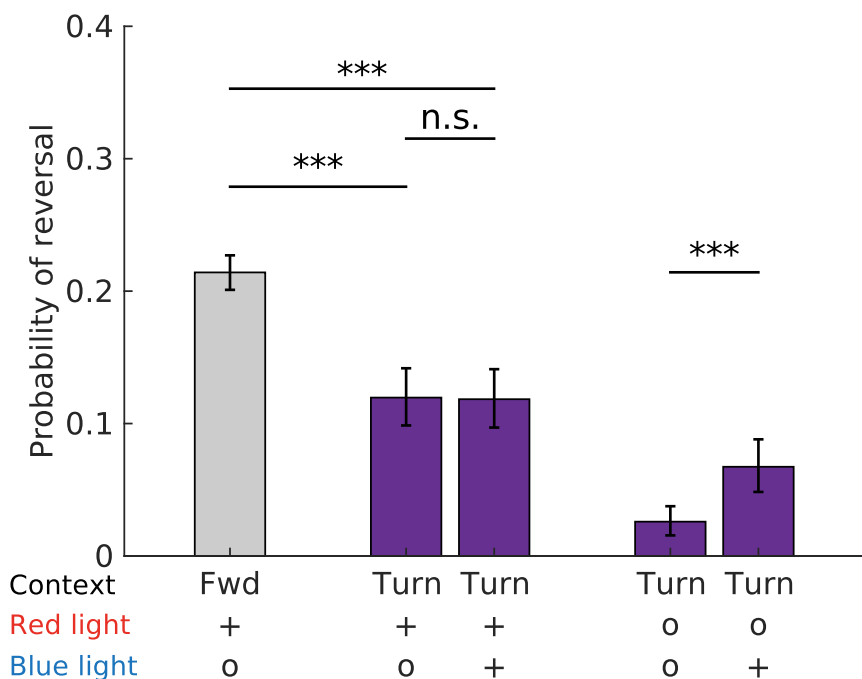**C**

gtACR2 in  
RIV, SMB, SAA

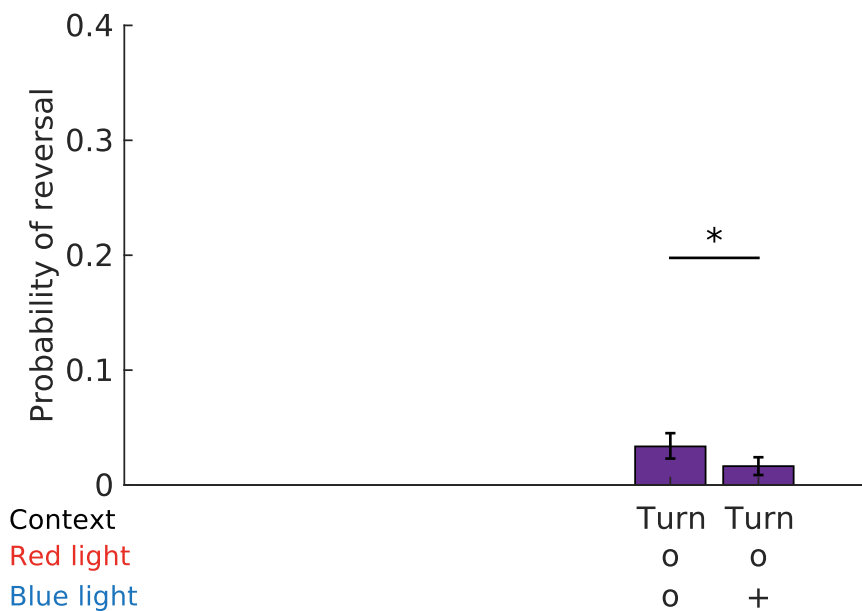

Source: https://storage.googleapis.com/plos-corpus-prod/10.1371/journal.pbio.3002280/2/pbio.3002280.s007.pdf?X-Goog-Algorithm=GOOG4-RSA-SHA256&X-Goog-Credential=wombat-sa%40plos-prod.iam.gserviceaccount.com%2F20240222%2Fauto%2Fstorage%2Fgoog4_request&X-Goog-Date=20240222T132824Z&X-Goog-Expires=86400&X-Goog-SignedHeaders=host&X-Goog-Signature=808bde3fc1630bb25d17db204d0d5872dea2acd7dad30ca8da97f40512fd84af11bd3e7c80e53da8ae7f23be21373a1128eaf7062c2f92dd41b0145f8ef15a17d4aa94e9b7f25408b9612cb5cf6022f4640da882758ff5c475f34406d1f2844e9a557fe9093a18eae7bdc9436642d100bd56232af1b5775ceb13ea48054cc73ad09767866587706da42c0fb48d3117ffb54c597708fc745264a9ec9cd0a8de0caf5fba7cb567c1acbbb8d9ef9f9129567eeb5f2043c002be383293769cf568cf2758d7a3d0980a98e6eea27f5ae7213e618b0d067631907b1b56fdad6db6784849cacb942bd926fafdbe5cc49465c69cde1eb717966eb7d61fb92a8078ee5379
